# Supplementary material for: Bloodmeal host identification with inferences to feeding habits of a fish-fed mosquito, Aedes baisasi
Source: PubMed Central journal article supplement (PMC6408532; doi:10.1038/s41598-019-40509-6), 2019-03-08

Scientific reports Supplementary Information Figure S1

## **Bloodmeal host identification with inferences to feeding habits of a fish-fed mosquito, *Aedes baisasi***

Takashi Miyake\*, Natsuki Aihara, Ken Maeda, Chuya Shinzato, Ryo Koyanagi,  
Hirozumi Kobayashi & Kazunori Yamahira

\*corresponding author, tmiyascb@gifu-u.ac.jp

Supplementary information Figure S1. Pictures of bloodmeal-host species of the mosquito *Aedes baisasi* in the Ryukyu Archipelago. (a) *Moringua microchir*; (b) *Pisodonophis boro*; (c) *Uropterygius concolor*; (d) *Gymnothorax pictus*; (e) *Periophthalmus argentilineatus*; (f) *Trypauchenopsis intermedia*; (g) *Mugilogobius* sp. 'Izumi-haze'; (h) *Bostrychus sinensis*; (i) *Myersina macrostoma*; (j) *Entomacrodus striatus*; (k) *Istiblennius edentulus*; (l) *Salarias luctuosus*; (m) *Salarias fasciatus*; (n) *Blenniella bilitonensis*; (o) *Rhinecanthus verrucosus*; photo credits: a–c and e–n (Ken Maeda); d and o (Katsunori Tachihara).

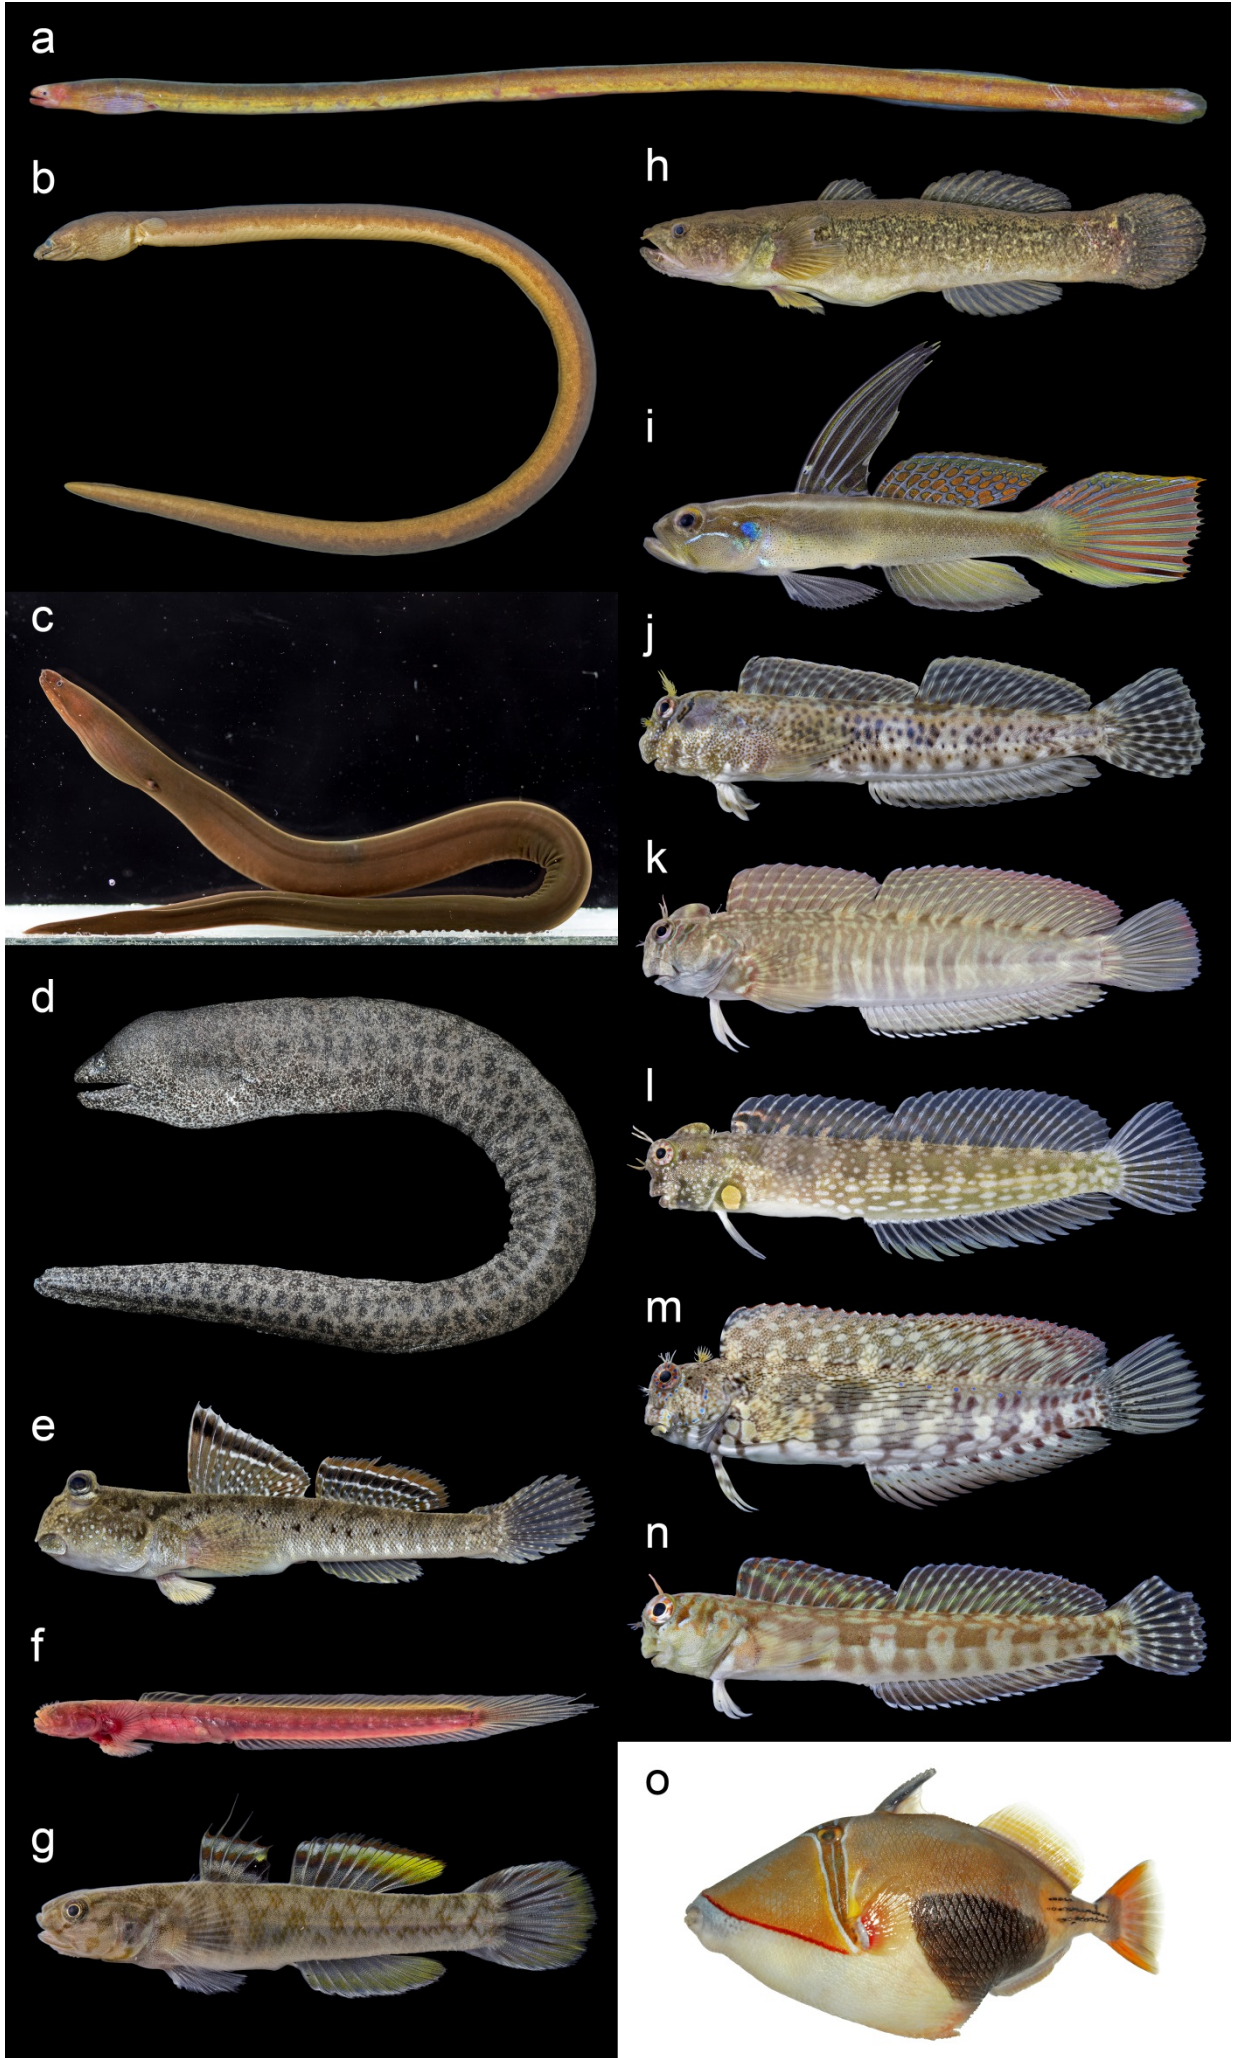

Supplement: 41598_2019_40509_MOESM2_ESM.pdf [file 41598_2019_40509_MOESM2_ESM.pdf]
